# Supplementary material for: Unique Organization of Extracellular Amylases into Amylosomes in the Resistant Starch-Utilizing Human Colonic Firmicutes Bacterium Ruminococcus bromii
Source: PubMed Central journal article supplement — mBio. 2015 Sep 29;6(5):e01058-15. doi: 10.1128/mBio.01058-15 (PMC4611034; doi:10.1128/mbio.01058-15), 2015-09-29
Supplement: mbo005152475sf1.pdf [file mbo005152475sf1.pdf]

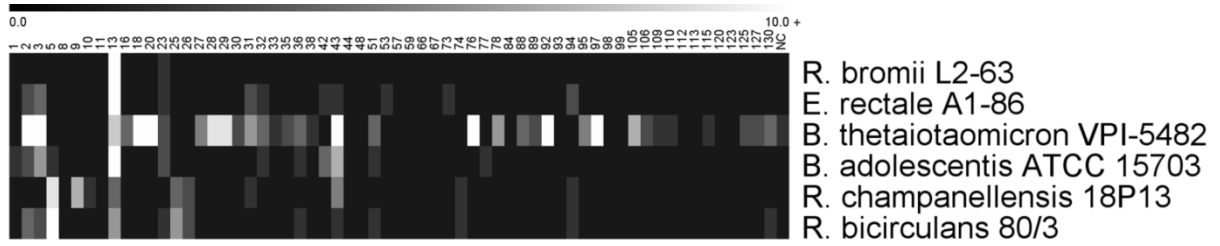

**Figure S1.** Heat map comparing glycoside hydrolase complement of *R. bromii* L2-63 with those of two related species of *Ruminococcus* and three unrelated amyolytic bacteria from the human colon. Numbers of GH genes are shown in Table S1.
