# Supplementary material for: Unique Organization of Extracellular Amylases into Amylosomes in the Resistant Starch-Utilizing Human Colonic Firmicutes Bacterium Ruminococcus bromii
Source: PubMed Central journal article supplement — mBio. 2015 Sep 29;6(5):e01058-15. doi: 10.1128/mBio.01058-15 (PMC4611034; doi:10.1128/mbio.01058-15), 2015-09-29
Supplement: mbo005152475sf2.pdf [file mbo005152475sf2.pdf]

## Dockerin containing proteins in *R. bromii* L2-63

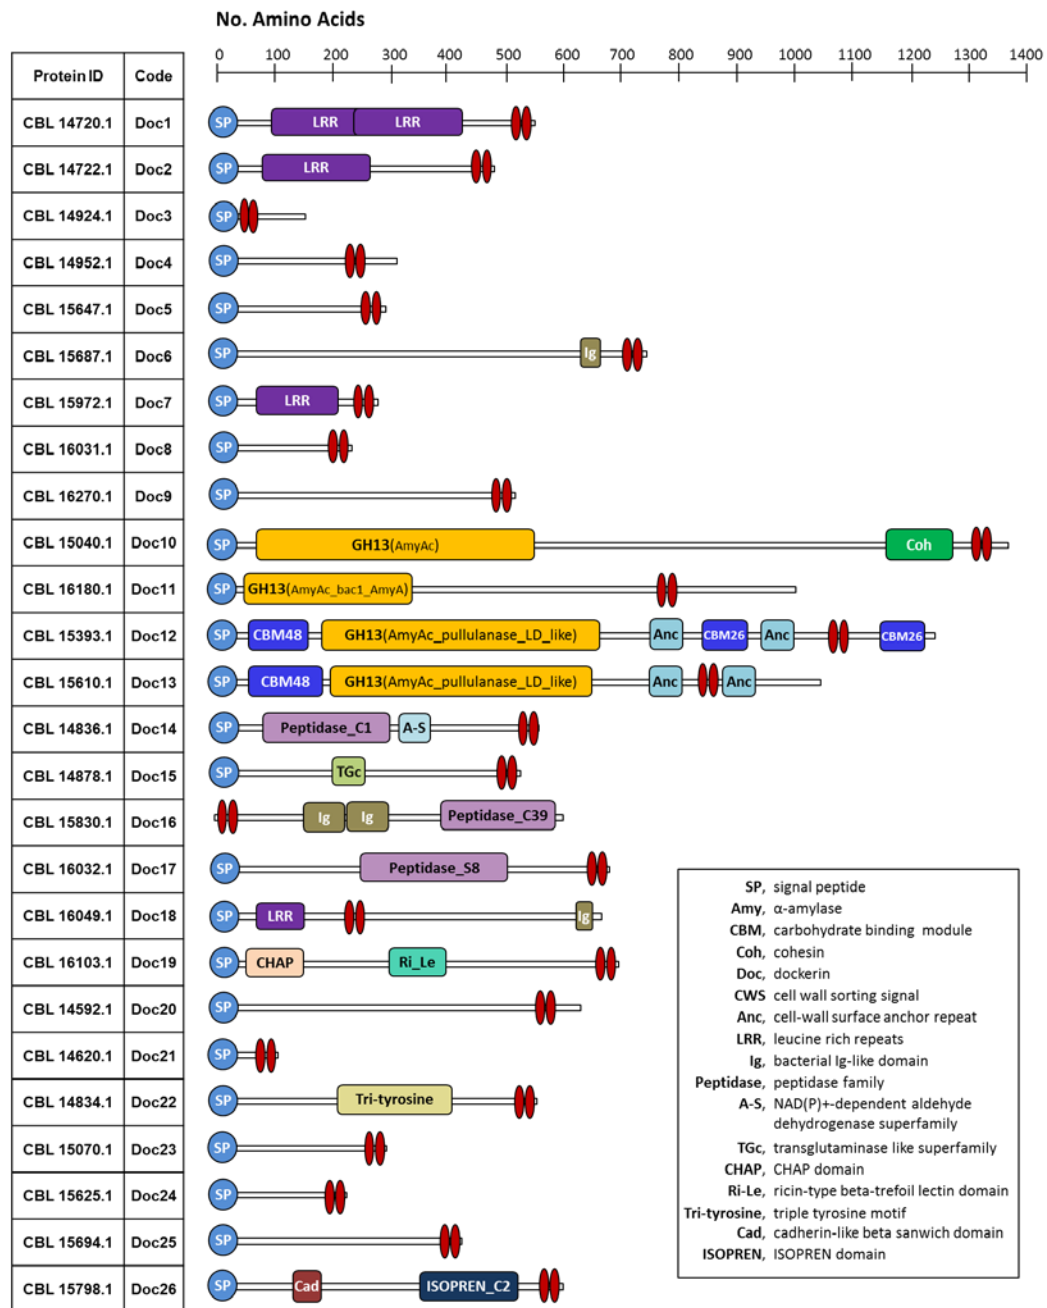

**Figure S2.** Predicted *R. bromii* proteins carrying dockerin modules
