# Supplementary material for: Unique Organization of Extracellular Amylases into Amylosomes in the Resistant Starch-Utilizing Human Colonic Firmicutes Bacterium Ruminococcus bromii
Source: PubMed Central journal article supplement — mBio. 2015 Sep 29;6(5):e01058-15. doi: 10.1128/mBio.01058-15 (PMC4611034; doi:10.1128/mbio.01058-15), 2015-09-29
Supplement: mbo005152475sf3.pdf [file mbo005152475sf3.pdf]

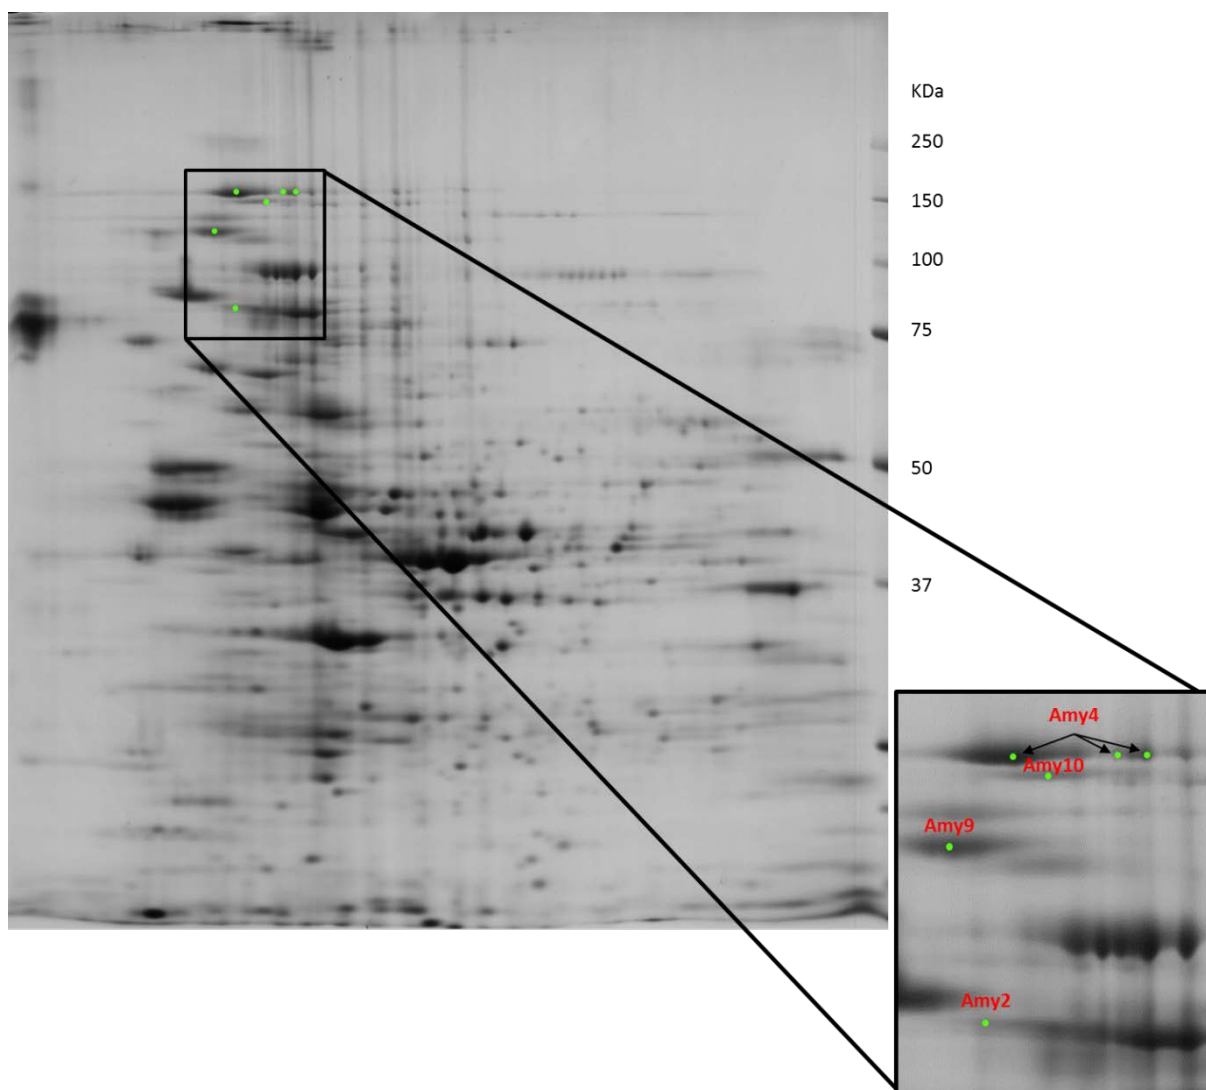

**Figure S3.** Proteome of the cell pellet fraction from *R. bromii* L-63 cultures grown on RUM supplemented with 0.2% of potato starch, resolved by two-dimensional gel electrophoresis. Cell cultures that had achieved an  $OD_{650}$  between 0.7 and 0.8 were harvested for proteomic analysis as described in Materials and Methods. Spots corresponding to large GH13 proteins are indicated in the expanded section.
