# Supplementary material for: Unique Organization of Extracellular Amylases into Amylosomes in the Resistant Starch-Utilizing Human Colonic Firmicutes Bacterium Ruminococcus bromii
Source: PubMed Central journal article supplement — mBio. 2015 Sep 29;6(5):e01058-15. doi: 10.1128/mBio.01058-15 (PMC4611034; doi:10.1128/mbio.01058-15), 2015-09-29
Supplement: mbo005152475st2.pdf [file mbo005152475st2.pdf]

**Table S2. GH13 enzymes encoded by the *R. bromii* L2-63 genome**

|               |                   | MWt     | size (aa) | Signal peptide    | Cohesin domain    | Dockerin domain   | TM domain <sup>a</sup> | Anc <sup>b</sup> |
|---------------|-------------------|---------|-----------|-------------------|-------------------|-------------------|------------------------|------------------|
| <b>Amy 1</b>  | <u>CBL14833.1</u> | 89,562  | 804       | <b><u>Yes</u></b> | No                | No                | No                     | No               |
| <b>Amy 2</b>  | <u>CBL14887.1</u> | 84,301  | 751       | <b><u>Yes</u></b> | No                | No                | No                     | No               |
| <b>Amy 3</b>  | <u>CBL14980.1</u> | 73,215  | 629       | No                | No                | No                | No                     | No               |
| <b>Amy 4</b>  | <u>CBL15040.1</u> | 144,688 | 1356      | <b><u>Yes</u></b> | <b><u>Yes</u></b> | <b><u>Yes</u></b> | No                     | No               |
| <b>Amy 5</b>  | <u>CBL15129.1</u> | 61,077  | 551       | <b><u>Yes</u></b> | No                | No                | No                     | No               |
| <b>Amy 6</b>  | <u>CBL15197.1</u> | 58,077  | 511       | No                | No                | No                | No                     | No               |
| <b>Amy 7</b>  | <u>CBL15422.1</u> | 49,024  | 427       | No                | No                | No                | No                     | No               |
| <b>Amy 8</b>  | <u>CBL16074.1</u> | 65,461  | 564       | No                | No                | No                | No                     | No               |
| <b>Amy 9</b>  | <u>CBL16180.1</u> | 113,486 | 1056      | <b><u>Yes</u></b> | No                | <b><u>Yes</u></b> | <b><u>Yes</u></b>      | No               |
| <b>Amy 10</b> | <u>CBL15393.1</u> | 133,483 | 1233      | <b><u>Yes</u></b> | No                | <b><u>Yes</u></b> | No                     | <b><u>x2</u></b> |
| <b>Amy 11</b> | <u>CBL15609.1</u> | 103,496 | 940       | No                | No                | No                | No                     | <b><u>x2</u></b> |
| <b>Amy 12</b> | <u>CBL15610.1</u> | 116,213 | 1059      | <b><u>Yes</u></b> | No                | <b><u>Yes</u></b> | No                     | <b><u>x2</u></b> |
| <b>Amy 13</b> | <u>CBL15412.1</u> | 74,456  | 640       | No                | No                | No                | No                     | No               |
| <b>Amy 14</b> | <u>CBL14779.1</u> | 88,492  | 766       | No                | No                | No                | No                     | No               |
| <b>Amy 15</b> | <u>CBL16075.1</u> | 80,015  | 694       | No                | No                | No                | No                     | No               |
